# Supplementary material for: Tuberculosis screening in household contacts of pulmonary tuberculosis patients in an urban setting
Source: PubMed Central journal article supplement (PMC7561118; doi:10.1371/journal.pone.0240594), 2020-10-15
Supplement: pone.0240594.s001.pdf [file pone.0240594.s001.pdf]

Name of TU:

TU No:

**HOUSEHOLD CONTACT CARD****Index TB patient details**

| Name of patient | TB No | MDR-TB treatment | Date of start of treatment | Sputum status | Number of household contacts |
|-----------------|-------|------------------|----------------------------|---------------|------------------------------|
|                 |       | Yes / No         |                            | Pos/Neg       |                              |

**Household contact – Baseline TB screening**

|                                                   |                |                                          |                                          |                                          |                                          |
|---------------------------------------------------|----------------|------------------------------------------|------------------------------------------|------------------------------------------|------------------------------------------|
| Contact screening no                              |                |                                          |                                          |                                          |                                          |
| Name of contact                                   |                |                                          |                                          |                                          |                                          |
| Age in years / months if < 1 year                 |                |                                          |                                          |                                          |                                          |
| Gender                                            |                | Male / Female                            | Male / Female                            | Male / Female                            | Male / Female                            |
| Mobile/Landline number                            |                |                                          |                                          |                                          |                                          |
| Current TB treatment                              |                | Yes / No                                 | Yes / No                                 | Yes / No                                 | Yes / No                                 |
| Known Diabetic                                    | Duration (yrs) | Yes / No                                 | Yes / No                                 | Yes / No                                 | Yes / No                                 |
| Known HIV reactive                                | Duration (yrs) | Yes / No                                 | Yes / No                                 | Yes / No                                 | Yes / No                                 |
| Smoking                                           | Duration (yrs) | Yes / No                                 | Yes / No                                 | Yes / No                                 | Yes / No                                 |
| Alcohol intake                                    | Duration (yrs) | Yes / No                                 | Yes / No                                 | Yes / No                                 | Yes / No                                 |
| On immunosuppressive drugs                        |                | Yes / No                                 | Yes / No                                 | Yes / No                                 | Yes / No                                 |
| TB treatment in the past                          |                | Yes / No                                 | Yes / No                                 | Yes / No                                 | Yes / No                                 |
| Currently pregnant                                |                | Yes / No/ NA                             | Yes / No/ NA                             | Yes / No/ NA                             | Yes / No/ NA                             |
| Contact screened for TB                           |                | Yes / No / NA                            | Yes / No / NA                            | Yes / No / NA                            | Yes / No / NA                            |
| Reason if 'no'                                    |                |                                          |                                          |                                          |                                          |
| Date of screening                                 |                |                                          |                                          |                                          |                                          |
| Presumptive TB symptoms                           |                | Yes / No                                 | Yes / No                                 | Yes / No                                 | Yes / No                                 |
| Body weight in Kgs /Height in cm                  |                |                                          |                                          |                                          |                                          |
| BMI                                               |                |                                          |                                          |                                          |                                          |
| <i>To be filled-in by Medical Officer</i>         |                |                                          |                                          |                                          |                                          |
| Chest x-ray                                       |                | Normal/Abnormal/ND                       | Normal/Abnormal/ND                       | Normal/Abnormal/ND                       | Normal/Abnormal/ND                       |
| Sputum /GA - Smear                                |                | Positive/Negative/ND                     | Positive/Negative/ND                     | Positive/Negative/ND                     | Positive/Negative/ND                     |
| Sputum /GA - Xpert MTB/RIF                        |                | Positive/Negative/ND                     | Positive/Negative/ND                     | Positive/Negative/ND                     | Positive/Negative/ND                     |
| Others –Investigations (Culture/FNAC/USG/HPE etc) |                |                                          |                                          |                                          |                                          |
| Tuberculin Skin Test (TST)                        |                | Positive/Negative/ND                     | Positive/Negative/ND                     | Positive/Negative/ND                     | Positive/Negative/ND                     |
| Screening outcome                                 |                | TB / Not suggestive of TB / NK           | TB / Not suggestive of TB / NK           | TB / Not suggestive of TB / NK           | TB / Not suggestive of TB / NK           |
| Reason if 'Not Known'                             |                |                                          |                                          |                                          |                                          |
| Started on ATT                                    |                | Yes / Eligible not started /Not required | Yes / Eligible not started /Not required | Yes / Eligible not started /Not required | Yes / Eligible not started /Not required |
| Started on IPT                                    |                | Yes / Eligible not started /Not required | Yes / Eligible not started /Not required | Yes / Eligible not started /Not required | Yes / Eligible not started /Not required |
| Remarks                                           |                |                                          |                                          |                                          |                                          |
| Signature of Medical Officer & date               |                |                                          |                                          |                                          |                                          |

ND: Not done; NA: Not applicable; NK: Not known; GA: Gastric Aspirate

**Household contact – Follow-up TB screening [Scheduled visit at 6 months and 12 months]**

|                                                              |                                                     |                                                     |                                                     |
|--------------------------------------------------------------|-----------------------------------------------------|-----------------------------------------------------|-----------------------------------------------------|
| <b>Contact screening no</b>                                  |                                                     |                                                     |                                                     |
| <b>Follow-up screening due date</b>                          |                                                     |                                                     |                                                     |
| <b>Contact screened for TB</b>                               | <b>Yes / No</b>                                     | <b>Yes / No</b>                                     | <b>Yes / No</b>                                     |
| <b>Reason if ‘no’</b>                                        |                                                     |                                                     |                                                     |
| <b>Follow- up screening done date</b>                        |                                                     |                                                     |                                                     |
| <b>Presumptive TB symptoms</b>                               | <b>Yes / No</b>                                     | <b>Yes / No</b>                                     | <b>Yes / No</b>                                     |
| <i>To be filled by Medical Officer</i>                       |                                                     |                                                     |                                                     |
| <b>Chest x-ray</b>                                           | <b>Normal/Abnormal/ND</b>                           | <b>Normal/Abnormal/ND</b>                           | <b>Normal/Abnormal/ND</b>                           |
| <b>Sputum /GA - Smear</b>                                    | <b>Positive/Negative/ND</b>                         | <b>Positive/Negative/ND</b>                         | <b>Positive/Negative/ND</b>                         |
| <b>Sputum /GA - Xpert MTB/RIF</b>                            | <b>Positive/Negative/ND</b>                         | <b>Positive/Negative/ND</b>                         | <b>Positive/Negative/ND</b>                         |
| <b>Others –Investigations<br/>(Culture/FNAC/USG/HPE etc)</b> |                                                     |                                                     |                                                     |
| <b>Screening outcome</b>                                     | <b>TB / Not suggestive of TB /<br/>NK</b>           | <b>TB / Not suggestive of TB /<br/>NK</b>           | <b>TB / Not suggestive of TB /<br/>NK</b>           |
| <b>Reason if ‘Not Known’</b>                                 |                                                     |                                                     |                                                     |
| <b>Started on ATT</b>                                        | <b>Yes / Eligible not started<br/>/Not required</b> | <b>Yes / Eligible not started<br/>/Not required</b> | <b>Yes / Eligible not started<br/>/Not required</b> |
| <b>Signature of Medical Officer &amp;<br/>date</b>           |                                                     |                                                     |                                                     |
|                                                              |                                                     |                                                     |                                                     |
| <b>Follow-up screening due date</b>                          |                                                     |                                                     |                                                     |
| <b>Contact screened for TB</b>                               | <b>Yes / No</b>                                     | <b>Yes / No</b>                                     | <b>Yes / No</b>                                     |
| <b>Reason if ‘no’</b>                                        |                                                     |                                                     |                                                     |
| <b>Follow- up screening done date</b>                        |                                                     |                                                     |                                                     |
| <b>Presumptive TB symptoms</b>                               | <b>Yes / No</b>                                     | <b>Yes / No</b>                                     | <b>Yes / No</b>                                     |
| <i>To be filled by Medical Officer</i>                       |                                                     |                                                     |                                                     |
| <b>Chest x-ray</b>                                           | <b>Normal/Abnormal/ND</b>                           | <b>Normal/Abnormal/ND</b>                           | <b>Normal/Abnormal/ND</b>                           |
| <b>Sputum /GA - Smear</b>                                    | <b>Positive/Negative/ND</b>                         | <b>Positive/Negative/ND</b>                         | <b>Positive/Negative/ND</b>                         |
| <b>Sputum /GA - Xpert MTB/RIF</b>                            | <b>Positive/Negative/ND</b>                         | <b>Positive/Negative/ND</b>                         | <b>Positive/Negative/ND</b>                         |
| <b>Others –Investigations<br/>(Culture/FNAC/USG/HPE etc)</b> |                                                     |                                                     |                                                     |
| <b>Screening outcome</b>                                     | <b>TB / Not suggestive of TB /<br/>NK</b>           | <b>TB / Not suggestive of TB /<br/>NK</b>           | <b>TB / Not suggestive of TB /<br/>NK</b>           |
| <b>Reason if ‘Not Known’</b>                                 |                                                     |                                                     |                                                     |
| <b>Started on ATT</b>                                        | <b>Yes / Eligible not started<br/>/Not required</b> | <b>Yes / Eligible not started<br/>/Not required</b> | <b>Yes / Eligible not started<br/>/Not required</b> |
|                                                              |                                                     |                                                     |                                                     |
| <b>Final outcome at One year</b>                             | <b>No TB / TB / Lost</b>                            | <b>No TB / TB / Lost</b>                            | <b>No TB / TB / Lost</b>                            |
| <b>Reason for ‘Lost’</b>                                     |                                                     |                                                     |                                                     |
| <b>Remarks</b>                                               |                                                     |                                                     |                                                     |
| <b>Signature of Medical Officer &amp;<br/>date</b>           |                                                     |                                                     |                                                     |

**ND: Not done; NK: Not known; GA: Gastric Aspirate**
