# Supplementary material for: Tuberculosis screening in household contacts of pulmonary tuberculosis patients in an urban setting
Source: PubMed Central journal article supplement (PMC7561118; doi:10.1371/journal.pone.0240594), 2020-10-15
Supplement: pone.0240594.s002.pdf [file pone.0240594.s002.pdf]

**HOUSEHOLD CONTACT REGISTER [Left side – page]**

| S.No | Name of Index patient | TB.No | Date of start of treatment | Number of household contact | Number of contacts currently on ATT | Number of contacts screened | Contact screening number | Screening date | Name | Age | Gender [M/F] | BMI [Kg/m <sup>2</sup> ] |
|------|-----------------------|-------|----------------------------|-----------------------------|-------------------------------------|-----------------------------|--------------------------|----------------|------|-----|--------------|--------------------------|
|      |                       |       |                            |                             |                                     |                             |                          |                |      |     |              |                          |
|      |                       |       |                            |                             |                                     |                             |                          |                |      |     |              |                          |
|      |                       |       |                            |                             |                                     |                             |                          |                |      |     |              |                          |
|      |                       |       |                            |                             |                                     |                             |                          |                |      |     |              |                          |
|      |                       |       |                            |                             |                                     |                             |                          |                |      |     |              |                          |
|      |                       |       |                            |                             |                                     |                             |                          |                |      |     |              |                          |
|      |                       |       |                            |                             |                                     |                             |                          |                |      |     |              |                          |
|      |                       |       |                            |                             |                                     |                             |                          |                |      |     |              |                          |
|      |                       |       |                            |                             |                                     |                             |                          |                |      |     |              |                          |
|      |                       |       |                            |                             |                                     |                             |                          |                |      |     |              |                          |
|      |                       |       |                            |                             |                                     |                             |                          |                |      |     |              |                          |
|      |                       |       |                            |                             |                                     |                             |                          |                |      |     |              |                          |
|      |                       |       |                            |                             |                                     |                             |                          |                |      |     |              |                          |
|      |                       |       |                            |                             |                                     |                             |                          |                |      |     |              |                          |
|      |                       |       |                            |                             |                                     |                             |                          |                |      |     |              |                          |
|      |                       |       |                            |                             |                                     |                             |                          |                |      |     |              |                          |

**M: Male, F: Female**
